# Supplementary material for: Does remote patient monitoring reduce acute care use? A systematic review
Source: PubMed Central journal article supplement — BMJ Open. 2021 Mar 2;11(3):e040232. doi: 10.1136/bmjopen-2020-040232 (PMC7929874; doi:10.1136/bmjopen-2020-040232), 2021-03-02
Supplement: bmjopen-2020-040232supp001.pdf [file bmjopen-2020-040232supp001.pdf]

Supplementary Table 1. Characteristics of included studies

| First Author, Year (Country)                | Study type | Patient group                     | Trial length (approx. months) | Sample size (close out if avail)  | Average/Mean age                                                         | M/F split                                                          | RPM device                              | Data collection type | Data review type (Active, Passive - alert) | Supplementary support modes | OUTCOME: All cause, condition-specific, both, or not specified        | Outcome findings as reported by authors in article                                                                                                                                                                                                                                                                                                                                                                                                                                                                            | Summary of RPM effect on acute care use                           |
|---------------------------------------------|------------|-----------------------------------|-------------------------------|-----------------------------------|--------------------------------------------------------------------------|--------------------------------------------------------------------|-----------------------------------------|----------------------|--------------------------------------------|-----------------------------|-----------------------------------------------------------------------|-------------------------------------------------------------------------------------------------------------------------------------------------------------------------------------------------------------------------------------------------------------------------------------------------------------------------------------------------------------------------------------------------------------------------------------------------------------------------------------------------------------------------------|-------------------------------------------------------------------|
| Achelrod, 2017 (Germany)                    | Cohort     | COPD                              | Baseline 24, Follow up 12     | 651 intervention; 7047 control    | 64.24 (Int); 69.47 (control before); 64.24 (control after)               | 43.93% female (Int); 49.17 (control before); 43.93 (control after) | Dedicated RPM unit + peripheral devices | Manual               | Passive                                    | Telephone                   | All-cause and condition-specific                                      | Hospitalisations due to all causes (-15.16 %, p<0.0001), due to COPD (-20.27 %, p<0.0001) and COPD-related ED presentations (-17.00 %, p<0.0001) were consistently lower in RPM patients, leading to fewer all-cause (-0.21, P<0.0001), COPD-related (-0.18, p\0.0001) and COPD-related ED presentations (-0.14, P<0.0001). On average, people in RPM group spent 3.1 (P<0.0001) and 2.07 (P<0.001) fewer days in hospital due to all causes and COPD, respectively, than control group.                                      | Decreased                                                         |
| Agboola, 2015 (USA)                         | Cohort     | Heart failure                     | 4                             | 174 intervention; 174 control     | 76.66 (10.71 SD) (Int); 76.76 (10.71 SD) (control)                       | 58.62% male (Int & control)                                        | Tablet + peripheral devices             | Manual               | Active                                     | Telephone                   | All-cause                                                             | Compared with controls, hospitalisation rates decreased within first 30 days of program enrollment (HR = 0.52, 95% CI 0.31-0.86, P=.01); Mean LOS similar in both groups (7 (8.92) RPM vs. 8 (8.83) control, P = 0.92).                                                                                                                                                                                                                                                                                                       | Decreased hospitalisation, no significant difference in LOS       |
| Akar, 2015 (USA)                            | Cohort     | Patients with CIEDs (unspecified) | 6                             | 20852 intervention; 16890 control | 67.5 (SD 12.1, 21-89) (Int); 66.5 (SD 13.0, 21-89) (control)             | 70.9% male (Int); 72.6% male (control)                             | CIED                                    | Automatic            | Passive                                    | Not stated                  | All-cause                                                             | Risk of rehospitalisation of RPM patients (n=9150, 60%) lower than those not using RPM (HR= 0.82, 95% CI 0.80–0.84, P<0.0001).                                                                                                                                                                                                                                                                                                                                                                                                | Decreased                                                         |
| Alshabani, 2019 (USA)                       | Cohort     | COPD                              | 12                            | 39                                | 68.6 (9.9)                                                               | M:F 20:19                                                          | Electronic inhaler monitoring device    | Automatic            | Passive                                    | Not stated                  | All-cause and condition-specific                                      | RPM associated with reduction in COPD-related ED presentations and hospitalisations combined per year - 2.2 (± 2.3) vs. 3.4 (± 3.2), p=0.01. All-cause this was also reduced, although difference was NS (3.4 (2.6) vs. 4.7 (4.1), P = 0.06).                                                                                                                                                                                                                                                                                 | Decreased condition-specific, no significant difference all-cause |
| Amara, 2017 (France)                        | RCT        | Patients with CIEDs (unspecified) | 12                            | 291 intervention; 304 control     | 79 (±8) (all, Int, and control)                                          | 63% male (all); 64% male (Int); 61% male (control)                 | CIED                                    | Automatic            | Passive                                    | Not stated                  | Condition-specific                                                    | In RPM group, 39 patients (13.4%) had CV-related hospitalisations vs. 42 patients (13.8%) in control group (NS); Mean LOS was 10 ± 14 days in the RPM vs. 11 ± 13 days in the control group (NS).                                                                                                                                                                                                                                                                                                                             | No significant difference                                         |
| Amir, 2017 (Israel)                         | Cohort     | Heart failure                     | Varied - <12                  | 50                                | 73.8 ± 10.3                                                              | 62% male                                                           | Dedicated RPM unit + peripheral devices | Automatic            | Passive                                    | Not stated                  | Condition-specific                                                    | The HR for hospital readmission rates between the pre-RPM period and the RPM period was 0.07 (95% CI 0.01–0.54, P = 0.01).                                                                                                                                                                                                                                                                                                                                                                                                    | Decreased                                                         |
| Bingler, 2018 (USA)                         | RCT        | Heart disease - infants           | Few months                    | 31                                | 1.44 (0.80 to 2.13) (1 month group); 0.70 (0.47 to 1.43) (2 month group) | 56.2% female (1 month grp); 26.7% female (2 month group)           | Tablet                                  | Manual               | Both                                       | Not stated                  | Not specified                                                         | Higher risk of having a high resource utilisation admission in control than RPM group (RR = 2.19, 95% CI 1.16-4.12, P = 0.016); Total LOS per 100 interstage days was significantly lower with RPM vs usual care. Difference in admissions NS - RPM 26 (0.9) vs. control 19 (1.0) - P = 0.75; Total ED presentations (ED presentations per 100 interstage days) RPM 20 (0.7) vs. control 13 (0.7) (P = 0.96).                                                                                                                 | Decreased                                                         |
| Bohingamu Mudiysanella, 2019 (Australia)    | RCT        | COPD and/or Diabetes              | 12                            | 86 intervention; 85 control       | 70.7 ± 11.56 (Int); 70.13 ± 13.26 (control)                              | 60% male (Int); 47% male (control)                                 | Tablet + peripheral devices             | Manual               | Both (out of hours alerts)                 | VC                          | Not specified                                                         | Lower mean acute hospital LOS over 12 months in RPM (4.6 vs. 8.7 days; 95% CI: -8.6 to 0.4); Difference in hospitalisations NS (proportion of participants who had at least one hospitalisation 53% vs. control 55%, P = 0.813).                                                                                                                                                                                                                                                                                              | Decreased LOS, no significant difference in hospitalisations      |
| Böhm, 2016 (Germany)                        | RCT        | Patients with CIEDs (HF)          | ~24                           | 175 intervention; 167 control     | 66.1 ± 10.1 (Int); 66.4 ± 10.7 (control)                                 | 77.2% male (Int); 82.3% male (control)                             | CIED                                    | Automatic            | Passive                                    | Not stated                  | All-cause and condition-specific (condition-specific result reported) | The number of HF hospitalisations per patient per year 0.24 for the RPM group and 0.30 for the control (P = 0.20).                                                                                                                                                                                                                                                                                                                                                                                                            | No significant difference                                         |
| Boriani, 2017 (Various - Europe and Israel) | RCT        | Patients with CIEDs (HF)          | ~24                           | 437 intervention; 428 control     | 66 ± 11 (Int); 67 ± 10 (control)                                         | 78.8% male (Int); 73.1% male (control)                             | CIED                                    | Automatic            | Passive                                    | Not stated                  | All-cause and condition-specific                                      | ED presentations (not followed by hospitalisation) significantly lower in RPM (IRR = 0.72, 95% CI 0.53–0.98, P = 0.04); Burden of CV-related healthcare resource utilization was 38% lower in RPM vs. control (IRR = 0.62, 95% CI 0.58–0.66, P<0.001); All-cause hospitalisation rates, estimated as the 2-year rate per 100 patients, were 96 (95% CI 86–106) and 90 (95% CI 80–100, P = 0.83), respectively. CV-related hospitalisations were 197 (111 due to HF) and 200 (103 due to HF) in RPM and control, respectively. | Decreased ED but increased unscheduled visits                     |
| Buchta, 2017 (Poland)                       | Cohort     | Patients with CIEDs (unspecified) | 24                            | 287 intervention; 287 control     | 61.94 (53.25 – 70.75) (Int); 62.80 (56.04 – 69.51) (control)             | 84% male (both)                                                    | CIED                                    | Automatic            | Passive                                    | Not stated                  | All-cause                                                             | No reduction in the number of defined medical contacts. Hospitalisations (P=NS) in control vs. RPM, respectively, in year 1, 2, 3 hospitalisations Year 1= 1.4 vs. 1.16; Year 2 = 0.74 vs. 0.42; Year 3= 0.55 vs. 0.36.                                                                                                                                                                                                                                                                                                       | No significant difference                                         |
| Bulava, 2016 (Czech Republic)               | RCT        | Patients with CIEDs (unspecified) | 26                            | 97 intervention; 101 control      | 66 ± 11 (Int); 68 ± 12 (control)                                         | 83.5% male (Int); 78.2% male (control)                             | CIED + dedicated RPM unit               | Automatic            | Passive                                    | Telephone                   | Not specified                                                         | LOS shorter in RPM group (10.3 ± 8.1 days, median: 8.0 days) vs. control group (17.5 ± 19.9 days, with median of 10.5 days, P = 0.027); 213 hospitalisations in total: 124 (58.2%) in control group and 89 (41.8%) in RPM group (P = 0.127).                                                                                                                                                                                                                                                                                  | Decreased                                                         |

|                           |                                                    |                                                      |                        |                                                    |                                                                                                                        |                                                                                                     |                                         |           |         |                                                 |                                  |                                                                                                                                                                                                                                                                                                                                                                                                                                                                                                                                                                                                                                                                  |                                                                                                            |
|---------------------------|----------------------------------------------------|------------------------------------------------------|------------------------|----------------------------------------------------|------------------------------------------------------------------------------------------------------------------------|-----------------------------------------------------------------------------------------------------|-----------------------------------------|-----------|---------|-------------------------------------------------|----------------------------------|------------------------------------------------------------------------------------------------------------------------------------------------------------------------------------------------------------------------------------------------------------------------------------------------------------------------------------------------------------------------------------------------------------------------------------------------------------------------------------------------------------------------------------------------------------------------------------------------------------------------------------------------------------------|------------------------------------------------------------------------------------------------------------|
| Capucci, 2017 (Italy)     | Cohort                                             | Patients with CIEDs (HF)                             | 12                     | 499 intervention; 488 control                      | 66 (12) (Int); 65 (13) (control)                                                                                       | 77% male (both)                                                                                     | CIED                                    | Automatic | Passive | Not stated                                      | Not specified                    | Rate of hospitalisations in first 12 months of follow-up was 0.16 and 0.27/year in RPM and control group, respectively (RR = 0.59; P = 0.004).                                                                                                                                                                                                                                                                                                                                                                                                                                                                                                                   | Decreased                                                                                                  |
| Celler, 2018 (Australia)  | Cohort                                             | Chronic conditions (unspecified)                     | 9                      | 114 intervention; 173 control                      | 71.1 (9.3) (Int); 71.9 (9.4) (control)                                                                                 | 64% male (Int); 56% male (control)                                                                  | Dedicated RPM unit                      | Manual    | NS      | Not stated (But said reminded to record vitals) | Not specified                    | RPM patients significant (P = 0.006) reduction in rate of hospitalisations vs. controls (P = 0.869); After one year of RPM average expected LOS reduced by almost 68% from predicted value of 24.6 to 7.9 days.                                                                                                                                                                                                                                                                                                                                                                                                                                                  | Decreased                                                                                                  |
| Chatwin, 2016 (UK)        | RCT                                                | Chronic lung disease (COPD and chronic resp failure) | 6                      | 38 intervention; 34 control                        | 61.8 (11.9)                                                                                                            | 48% male                                                                                            | Dedicated RPM unit + peripheral devices | Manual    | Active  | Telephone                                       | Not specified                    | Respiratory hospitalisations for acute exacerbations at 6 months increased in RPM group — frequency 0.32 control vs. 0.63 RPM (mean difference 0.32, P = 0.026). Although time to first admission did not change, actual hospitalisations doubled from 18 to 36.                                                                                                                                                                                                                                                                                                                                                                                                 | Increased                                                                                                  |
| Clarke, 2018 (UK)         | Cohort                                             | COPD                                                 | 3 monitor, 12 pre data | 227                                                | 70.9 ± 8.9                                                                                                             | 50% male                                                                                            | Dedicated RPM unit + peripheral devices | Manual    | Active  | RM unit message                                 | All-cause and condition-specific | Average LOS decreased in one group from 11.5 in period 12 months before to 6.5 days during RPM; In other group average LOS decreased 7.5 to 5.2 days; For all other causes there was a reduction in LOS during RPM period vs. period 12 months before (9%) but an increase (10%) vs. period immediately before RPM; COPD hospitalisations increased from 64 to 71; Other hospitalisations decreased 43 to 39.                                                                                                                                                                                                                                                    | Decreased LOS, variability in hospitalisations, and changed if compared to immediate pre or 12 months pre. |
| Comin-Colet, 2016 (Spain) | RCT                                                | Heart failure                                        | 6                      | 81 intervention; 97 control                        | 74 ± 11 (Int); 75 ± 11 (control)                                                                                       | 43% female (Int); 39% female (control)                                                              | Tablet                                  | Manual    | Active  | Telephone, VC                                   | All-cause and condition-specific | HF readmission (HR = 0.39, CI 0.19–0.77, P = 0.007) and CV readmission (HR = 0.43, CI 0.23–0.80, P = 0.008) were reduced in RPM group; mean LOS significantly reduced in RPM group for all cause, HF and CV readmissions. In patients hospitalised, mean LOS tended to be shorter in RPM group. In adjusted models, results were similar.                                                                                                                                                                                                                                                                                                                        | Decreased                                                                                                  |
| Cross, 2019 (USA)         | RCT                                                | Inflammatory bowel disease                           | 12                     | 231 intervention; 117 control                      | 40.1 ± 13.2 (Every other week [EOW] cohort; 36.4 ± 11.5 (Weekly cohort); 40.1 ± 11.7 (control). All = 38.9 ± 12.3 yrs) | 41.7% male (Int every two weeks); 43.1% male (Int weekly); 45.3% male (control); All = 56.6% female | Smartphone                              | Manual    | Passive | SMS                                             | All-cause and condition-specific | IBD-related hospitalisations increased in the control group from 14.7 to 16.4; however in the RPM EOW and RPM Weekly, IBD-related hospitalisations decreased from 24.3 to 14.4 and 24.1 to 9.8 respectively. The difference in IBD-related hospitalisation was significant for the RPM weekly group only (P = 0.04); Non-IBD related hospitalisations increased from 3.4 to 11.2 in controls and decreased from 5.5 to 0.9 and 5.4 to 2.7 in the RPM EOW and weekly cohorts respectively (P = 0.02 in RPM EOW and p = 0.04 in RPM weekly; Decrease in hospitalisations but increase in non-invasive diagnostic tests, telephone calls and electronic encounters. | Decreased                                                                                                  |
| D'Ancona, 2017 (Germany)  | Cohort                                             | Patients with CIEDs (unspecified)                    | 12                     | 720 RM capable devices (91 activated); 503 control | 68 (58–75) (Int); 67 (57–75) (control)                                                                                 | 20% female (Int); 21.5% female (control)                                                            | CIED                                    | Automatic | Passive | Not stated                                      | All-cause                        | RPM patients had higher re-hospitalisation rate (45.2% vs. 34.8%, P = 0.059).                                                                                                                                                                                                                                                                                                                                                                                                                                                                                                                                                                                    | Increased                                                                                                  |
| Davis, 2015 (USA)         | Cohort                                             | HF, COPD                                             | 3                      | 117 intervention; 233 control                      | COPD: 61 (11) (Int); 63 (15.8) (control)<br>HF: 62 (16.6) (Int); 65 (14.6) (control)                                   | COPD: 62.1% female (Int); 60.3% female (control)<br>HF: 45.8% female (Int); 56% female (control)    | Dedicated RPM unit                      | Manual    | Passive | Telephone, Dedicated RM unit message            | All-cause                        | 30-day re-admissions were reduced 50% for both chronic disease cohorts vs. control (COPD, 10.3% vs. 21.8%, HF, 8.5% vs. 17%); 37% reduction in ED presentations in the 30-day postdischarge period for COPD cohort compared with control patients (6.9% vs. 10.9%), but 75% increase in ED presentations for the HF cohort (11.9% vs. 6.8%) in the 30 days after the index discharge; Admissions 150 to 49 in COPD but 50 to 52 in HF.                                                                                                                                                                                                                           | Decreased for COPD, increased ED and hospitalisations for HF                                               |
| De Luca, 2016 (Italy)     | RCT                                                | Nursing home patients; Mental health                 | Not specified          | 32 intervention; 27 control                        | 77 (71–80) (Int); 85 (79–89) (control)                                                                                 | 34.4% male (Int); 29.6% male (control)                                                              | Dedicated RPM unit + peripheral devices | Manual    | Active  | VC                                              | Not specified                    | Admission to health care service was higher ( $\chi^2 = 3.96$ , P<0.05) in control group (8/27) vs. RPM group (3/32).                                                                                                                                                                                                                                                                                                                                                                                                                                                                                                                                            | Decreased                                                                                                  |
| De Simone, 2015 (Italy)   | Non-randomised controlled trial/Quasi-experimental | Patients with CIEDs (unspecified)                    | 24                     | 499 intervention; 488 control                      | 66 ± 12 (Int); 66 ± 13 (control)                                                                                       | 76% male (Int); 78% male (control)                                                                  | CIED                                    | Automatic | Passive | Not stated                                      | All-cause and condition-specific | RPM reduced risk of all-cause hospitalisations (87 vs. 129; 0.15 vs. 0.28 events/year; IRR = 0.54, 95% CI 0.41–0.71, P < 0.001) and CV hospitalisations (60 vs. 89; 0.11 vs. 0.20 events/year; IRR = 0.54, 95% CI 0.38–0.75, P < 0.001) vs. control group; LOS was 517 days (0.91 days/year) in RPM group and 974 days (2.15 days/year) in control group.                                                                                                                                                                                                                                                                                                        | Decreased                                                                                                  |
| De Simone, 2019 (Italy)   | Cohort                                             | Patients with CIEDs (AF)                             | 12                     | 26 intervention; 45 control                        | 82 [79–87] (Int); 85 [78–89] (control)                                                                                 | 34.6% female (Int); 53.3% female (control)                                                          | CIED                                    | Automatic | Passive | Not stated                                      | All-cause                        | All-cause hospitalisations were 33, with lower event rate in RPM group vs. control (5.8; 95% CI 3.3–9.4 vs. 9.7; 95% CI 6.5–13.9 per 100 patient-months; P = 0.027); RR with RPM was significant for all-cause hospitalisation (RR= 0.44, 95% CI 0.21–0.93).                                                                                                                                                                                                                                                                                                                                                                                                     | Decreased                                                                                                  |

|                                     |        |                                   |    |                               |                                                                           |                                                                               |                                        |           |         |                                                                      |                                  |                                                                                                                                                                                                                                                                                                                                                                                                                                                                                                                                                                                                                                                                                                                                                                               |                                                              |
|-------------------------------------|--------|-----------------------------------|----|-------------------------------|---------------------------------------------------------------------------|-------------------------------------------------------------------------------|----------------------------------------|-----------|---------|----------------------------------------------------------------------|----------------------------------|-------------------------------------------------------------------------------------------------------------------------------------------------------------------------------------------------------------------------------------------------------------------------------------------------------------------------------------------------------------------------------------------------------------------------------------------------------------------------------------------------------------------------------------------------------------------------------------------------------------------------------------------------------------------------------------------------------------------------------------------------------------------------------|--------------------------------------------------------------|
| Esteban, 2016 (Spain)               | Cohort | COPD                              | 24 | 120 intervention; 78 control  | 71.34 (Int); 70.1 (control) ALL: 70.83                                    | 86.6% male (Int); 87.2% male (control); All: 86.8% male                       | Smartphone                             | Manual    | Active  | Telephone                                                            | Condition-specific               | After 2 years, both cohorts showed reduction in rate of hospitalisations (P<0.001) but reduction was significantly higher in RPM group (1.14 vs. 2.33, P<0.001); Significant differences in rate of ED presentations (pre-post = 0.4 (0.1–0.6) P = 0.006), cumulative LOS, and rate of 30-day readmission during study period; In multivariate analysis, being in the RPM group was independently associated with lower rates of hospitalisations (IRR = 0.38, 95% CI 0.27–0.54, P<0.0001), ED presentation (IRR = 0.56, 95% CI 0.35–0.92, P<0.02), and 30-day readmission (IRR = 0.46, 95% CI 0.29–0.74, P<0.001), as well as cumulative LOS (IRR = 0.58, 95% CI 0.46–0.73, P<0.0001).                                                                                       | Decreased                                                    |
| Flaherty, 2017 (USA)                | RCT    | Schizophrenia                     | 3  | 20 intervention; 25 control   | 49.9 ± 12.7 (Int); 51.2 ± 11.1 (control)                                  | 90% male (Int); 96% male (control)                                            | Dedicated RPM unit                     | Manual    | Active  | Telephone, In-person                                                 | Not specified                    | RPM group significantly less likely vs. control group to have at least one hospitalisation (5.0% vs. 32.0%, P<0.05). Also, RPM group had significantly lower average number of hospitalisations (0.10 ± 0.45 vs. 0.60 ± 1.19, Mann Whitney U=4.67, df=1, P<0.05). RPM group also had significantly lower mean LOS (0.70 ± 3.13 vs. 2.56 ± 6.11, Mann Whitney U,=4.59, df=1, P<0.05). No significant differences were found between groups in terms of numbers of psychiatric hospitalisations (0.65 ± 1.04 vs. 0.52 ± 0.77). Additionally, RPM and control groups did not differ on ED presentations (0.60 ± 1.23 vs. 0.92 ± 1.19).                                                                                                                                           | Decreased hospitalisations, no significant difference on ED  |
| Galinier, 2020 (France)             | RCT    | Heart failure                     | 18 | 305 intervention; 327 control | 70.0±12.4 (Int); 69.7±12.5 (Control)                                      | 73.4% male (Int); 71.0% male (control)                                        | Electronic scales + Dedicated RPM unit | Manual    | Passive | Telephone                                                            | All-cause and condition-specific | Mean±SD number of unplanned hospitalisations for HF was 0.59±1.26 for telemonitoring and 0.75±1.42 for SC (rate ratio 0.84, 95% CI 0.62–1.15; P = 0.28); RPM associated with 21% RR reduction in first unplanned hospitalisation for HF [hazard ratio (HR) 0.79, 95% CI 0.62–0.99; P = 0.044]; Mean±SD annualised cumulative number of days in hospital 36.3±54.4 (RPM) vs 34.1±47.0 (SC) P = 0.34. Among the secondary outcomes, telemonitoring reduced the relative risk of occurrence of first unplanned hospitalisation for HF by 21% after adjustment for known predictive factors. Median time to first HF hospitalisation was also numerically delayed by 18 days in the telemonitoring group, but the difference did not reach the level of statistical significance. | No significant difference                                    |
| Geller, 2019 (Germany)              | RCT    | Patients with CIEDs (HF)          | 12 | 333 intervention; 331 control | ICD 65 [58–70]; CRT-D 68 [62–74]; (control not reported)                  | ICD 85.0% male; CRT-D 77.7% male; (control group not reported)                | CIED                                   | Automatic | Passive | Not stated                                                           | All-cause                        | Hospitalisations for worsening HF in RPM vs. control group was 14 vs. 13 (ICD) and 30 vs. 34 (CRT-D). Number of affected patients was 10 vs. 8 (ICD: 7.0% vs. 6.1%, P = 0.81) and 17 vs. 26 (CRT-D: 8.9% vs. 13.0%; P = 0.26), the median length of hospital stay was 9.0 vs. 7.0 days (ICD: P = 0.38) and 7.0 vs. 7.5 days (CRT-D: P = 0.43), respectively.                                                                                                                                                                                                                                                                                                                                                                                                                  | No significant difference                                    |
| Gingele, 2019 (Netherlands)         | RCT    | Heart failure                     | 12 | 197 intervention; 185 control | 71.0 ± 11.9 (Int); 71.9 ± 10.5 (control)                                  | 58% male (Int); 60% male (control)                                            | Dedicated RPM unit                     | Manual    | Active  | "contacted with advice" "twice had personal contact with specialist" | Condition-specific               | RPM group had significantly fewer HF-related hospitalisations vs. control group (IRR = 0.54, 95% CI 0.31–0.88). However, HF-related LOS was not significantly shorter in RPM group (IRR = 0.60, 95% CI 0.33–1.07).                                                                                                                                                                                                                                                                                                                                                                                                                                                                                                                                                            | Decreased hospitalisations, no significant difference in LOS |
| Hale, 2016 (USA)                    | RCT    | Heart failure                     | 3  | 11 intervention; 14 control   | 68.4 (11.8) (intervention); 74.4 (10.4) (control)                         | 64% male (both)                                                               | MedSentry electronic medication device | Automatic | Active  | Telephone                                                            | All-cause and condition-specific | Approximately 9% (1/11) of RPM participants were hospitalised one or more times vs. 50% (7/14) control participants (P = 0.04), a relative risk reduction in hospitalisation of approximately 82%. RPM group had significantly fewer all-cause hospitalisation days vs. controls (4 vs 34, P = 0.03) and there was a reduction in the LOS for HF-related and non-HF-related hospitalisations (NS, P = 0.24). ED presentations all cause and HF-related were reduced (NS, 6 to 3 and 3 to 1, respectively).                                                                                                                                                                                                                                                                    | Decreased                                                    |
| Hansen, 2018 (Germany)              | RCT    | Patients with CIEDs (HF)          | 13 | 102 intervention; 108 control | 62.5 ± 12.2 (Telemetry); 64.7 ± 9.1 (remote + phone); 65.4 ± 11.1 (visit) | 16.7% female (telemetry); 13.2% female (remote + phone); 16.4% female (visit) | CIED + dedicated RPM unit              | Automatic | Passive | Website                                                              | Condition-specific               | HF-hospitalisation occurred at similar rates in the RPM and control groups (9.8% vs. 12.0%, P = 0.605).                                                                                                                                                                                                                                                                                                                                                                                                                                                                                                                                                                                                                                                                       | No significant difference                                    |
| Heidbuchel, 2015 (Various - Europe) | RCT    | Patients with CIEDs (unspecified) | 24 | 159 intervention; 144 control | 62.4 ± 13.1 (ALL); 62.0 ± 13.9 (Int); 62.9 ± 12.3 (control)               | 80.5% male (ALL); 78% male (Int); 83.3% male (control)                        | CIED                                   | Automatic | Passive | Not stated                                                           | All-cause and condition-specific | Fewer CV hospitalisations and shorter LOS in RPM patients, but NS. CV hospitalisations control vs. RPM = 0.85 (1.43) vs. 0.67 (1.18), P = 0.233; LOS (days) 8.26 (18.6) vs. 6.31 (15.5), P = 0.266.                                                                                                                                                                                                                                                                                                                                                                                                                                                                                                                                                                           | No significant difference                                    |

|                                                                  |                     |                                  |    |                               |                                                                                                                                                    |                                                                                                                  |                                         |        |         |               |                                  |                                                                                                                                                                                                                                                                                                                                                                                                                                                                                                                                              |                                                                    |
|------------------------------------------------------------------|---------------------|----------------------------------|----|-------------------------------|----------------------------------------------------------------------------------------------------------------------------------------------------|------------------------------------------------------------------------------------------------------------------|-----------------------------------------|--------|---------|---------------|----------------------------------|----------------------------------------------------------------------------------------------------------------------------------------------------------------------------------------------------------------------------------------------------------------------------------------------------------------------------------------------------------------------------------------------------------------------------------------------------------------------------------------------------------------------------------------------|--------------------------------------------------------------------|
| Ho, 2016 (Taiwan)                                                | RCT                 | COPD                             | 6  | 53 intervention; 53 control   | 81.4 ± 7.8 (Int); 79.0 ± 9.6 (control)                                                                                                             | 81% male (Int); 72% male (control)                                                                               | Website                                 | Manual | Active  | Not stated    | All-cause and condition-specific | RPM associated with a significant reduction in number of all-cause re-admissions from 0.68 to 0.23 per patient (P = 0.002). RPM patients had fewer ED presentations for all causes vs. control group (0.36 vs. 0.91 per patient, P = 0.006).                                                                                                                                                                                                                                                                                                 | Decreased                                                          |
| Ishani, 2016 (USA)                                               | RCT                 | CKD                              | 12 | 451 intervention; 150 control | 75.3 ± 8.1 (Int); 74.3 ± 8.1 (control)                                                                                                             | 98.7% male (Int); 98.0% male (control)                                                                           | Dedicated RPM unit + peripheral devices | Manual | Active  | VC            | All-cause                        | RPM did not reduce the risk for hospitalisation or ED presentations vs. usual care; Hospitalisations HR = 1.15; 95% CI 0.80-1.63, ED presentations HR = 0.92; 95% CI, 0.68-1.24.                                                                                                                                                                                                                                                                                                                                                             | No significant difference                                          |
| Jenneve, 2020 (France)                                           | Cohort              | Heart failure                    | 24 | 159                           | 72.9 years (34–96)                                                                                                                                 | 64.3% male                                                                                                       | Website + scale                         | Manual | Passive | Telephone     | Condition-specific               | Mean number of days hospitalised for HF per patient per year was 8.33 (6.84–10.13) in the year preceding enrollment, 2.6 (1.51–4.47) at one year of follow-up, and 2.82 at two years of follow-up (1.30–6.11) (p < 0.01 for both comparisons). Number of patients hospitalised for HF was 112 in the year preceding enrollment and 23 or 15 at 1 and 2 years of follow up, respectively.                                                                                                                                                     | Decreased                                                          |
| Jimenez-Marrero, 2020 (Spain)                                    | RCT                 | Heart failure                    | 6  | 50 intervention; 66 control   | 77 years                                                                                                                                           | 47% female                                                                                                       | Tablet computer                         | Manual | Passive | Not stated    | All-cause and condition-specific | There were statistically significant lower risks hospitalisations comparing telemedicine to usual care; Hospitalisation from non-cardiovascular causes was similar in the two arms- Usual care vs Telemedicine - HF hospitalisation 29 vs 10 P = 0.011 HR 0.38 (0.16–0.90); CV hospitalisation 37 vs 13 P = 0.009 HR 0.40 (0.19–0.86); Non-CV hospitalisation 12 vs 7 P = 0.796 HR 1.01 (0.35–2.88); All-cause hospitalisation 51 vs 21 P = 0.017 HR 0.52 (0.28–0.98)                                                                        | Decreased                                                          |
| Kalter-Leibovici, 2017 (Israel)                                  | RCT                 | Heart failure                    | 30 | 682 intervention; 678 control | 70.8 (11.6) (Int); 70.7 (11.0) (control)                                                                                                           | 69.3% male (Int); 75.7% male (control)                                                                           | Dedicated RPM unit                      | Manual | Passive | Telephone, VC | All-cause                        | No significant differences in LOS (adjusted RR = 0.886; 95% CI 0.749-1.048), and hospitalisations for all causes (adjusted RR = 0.935; 95% CI 0.840-1.040).                                                                                                                                                                                                                                                                                                                                                                                  | No significant difference                                          |
| Kao, 2016 (USA)                                                  | Cohort              | Heart failure                    | 36 | 623 intervention; 623 control | 78.76 ± 9.08 (Int); 77.39 ± 8.59 (control)                                                                                                         | 56.7% male (Int); 52.3% male (control)                                                                           | Dedicated RPM unit                      | Manual | Active  | Telephone     | All-cause                        | A reduction of 22.7% in quarterly hospitalisations noted in RPM vs. matched controls (D = -0.05 hospitalisations/quarter; 95% CI -0.09 to -0.01; P = 0.012). No significant differences between RPM and matched control cohorts in all-cause LOS per quarter or all cause ED presentations.                                                                                                                                                                                                                                                  | No significant difference in LOS or ED, decreased hospitalisations |
| Kenealy, 2015 (New Zealand)                                      | RCT - except site C | Chronic conditions (unspecified) | 6  | 98 intervention; 73 control   | SITE A: 72 (62–83) (Int); 72 (60–77) (control)<br>SITE B: 67 (64–74) (Int); 67.5 (63–72.5) (control)<br>SITE C: 57 (53-60) (Int); no control group | SITE A: 39% female (Int); 29% female (control); SITE B: 38% female (both); SITE C: 60% female (no control group) | Dedicated RPM unit + peripheral devices | Manual | Active  | Not stated    | All-cause                        | RPM group showed no significant change in hospitalisations vs. usual care (coefficient 0.32, P = 0.15), ED presentations (coefficient -0.08, P = 0.91), or LOS (coefficient 0.51, P = 0.09).                                                                                                                                                                                                                                                                                                                                                 | No significant difference                                          |
| Kessler, 2018 (Various - Europe (France, Germany, Italy, Spain)) | RCT                 | COPD                             | 12 | 172 intervention; 173 control | 67.3 ± 8.9 (Int); 66.6 ± 9.6 (control); ALL 66.9 ± 9.3                                                                                             | 69.4% male (Int); 69.8% male (control)                                                                           | Telephone                               | Manual | Active  | Telephone     | All-cause and condition-specific | No significant difference in all-cause LOS (non-parametric analysis (p=0.161) or ANOVA comparison of the mean values adjusted for country differences (-5.3 days, 95% CI -13.7 to 3.1; P = 0.212). Difference was 7.4 ± 35.4 in RPM group and 22.6 ± 41.8 in control group, with medians (IQR) of 0 (0–203) days and 5 (0–259) days, respectively. The total numbers of unplanned hospitalisations were similar for both groups (RPM group, n=157; control group, n=160). LOS due to acute exacerbation of COPD not significantly different. | No significant difference                                          |
| Koehler, 2018 (Germany)                                          | RCT                 | Heart failure                    | 12 | 765 intervention; 773 control | 70 (11) (Int); 70 (10) (control)                                                                                                                   | 70% male (Int); 69% male (control)                                                                               | Tablet + peripheral devices             | Manual | Active  | Telephone     | Condition-specific               | RPM group had shorter LOS vs. control group for unplanned hospitalisations due to worsening HF (mean 3.8 days per year, 95% CI 3.5–4.1 vs. 5.6 days per year, 5.2–6.0, respectively). The percentage of days lost for this outcome for RPM and control groups was 1.04% (95% CI 0.96–1.11) and 1.53% (1.43–1.64), respectively (ratio 0.80, 95% CI 0.67–0.95; P = 0.0070).                                                                                                                                                                   | Decreased                                                          |



|                             |                                                      |                                    |               |                                                                    |                                                                                                        |                                                                                          |                                         |           |         |                                                                    |                                                              |                                                                                                                                                                                                                                                                                                                                                                                                                                                                                                 |                                                                                       |
|-----------------------------|------------------------------------------------------|------------------------------------|---------------|--------------------------------------------------------------------|--------------------------------------------------------------------------------------------------------|------------------------------------------------------------------------------------------|-----------------------------------------|-----------|---------|--------------------------------------------------------------------|--------------------------------------------------------------|-------------------------------------------------------------------------------------------------------------------------------------------------------------------------------------------------------------------------------------------------------------------------------------------------------------------------------------------------------------------------------------------------------------------------------------------------------------------------------------------------|---------------------------------------------------------------------------------------|
| Koulaouzidis, 2019 (UK)     | Cohort                                               | Heart failure                      | 12            | 124 intervention; 345 control                                      | 68.1 (12.7) (Int); 67.5 (10.6) (control)                                                               | 78.2 male (Int); 68.1% male (control)                                                    | Dedicated RPM unit + peripheral devices | Manual    | Active  | Not stated                                                         | All-cause hospitalisation and condition-specific readmission | There was no difference between the two groups in all-cause hospitalisation, either in number of subjects hospitalised (P = 0.7) or in number of admissions per patient (P = 0.6). No difference in number of HF-related readmissions per person between the two groups (P = 0.5), but LOS per person was higher in control group (P = 0.03).                                                                                                                                                   | Decreased LOS, no significant difference in hospitalisation                           |
| Kraai, 2016 (Netherlands)   | RCT                                                  | Heart failure                      | 9             | 94 intervention; 83 control                                        | 69 ± 12 (Int); 69 ± 11 (control);                                                                      | 70% male (Int); 75% male (control)                                                       | Dedicated RPM unit + peripheral devices | Manual    | Passive | Telephone                                                          | All-cause and condition-specific                             | HF-readmission 28% vs. 27% P = 0.87; All-cause readmission was 49% vs. 51% (P = 0.78).                                                                                                                                                                                                                                                                                                                                                                                                          | No significant difference                                                             |
| Kurek, 2017 (Poland)        | Cohort                                               | Patients with CIEDs (HF)           | 12            | 287 intervention; 287 control                                      | 63 (56–69) (Int); 62 (53–70) (control)                                                                 | 84% male (both)                                                                          | CIED + dedicated RPM unit               | Automatic | Passive | Not stated                                                         | Condition-specific                                           | Number of HF-related hospitalisations in 1-year observation was comparable (1.71 vs. 1.65 visits/per patient, P = 0.27).                                                                                                                                                                                                                                                                                                                                                                        | No significant difference                                                             |
| Ladapo, 2016 (USA)          | Cohort                                               | Patients with CIEDs (unspecified)  | 24            | 2849 intervention (ICD, CRT-D and pacemaker); 2849 matched control | After matching ICD: 64 (12) (Int); 65 (12) (control); CRT-D: 69 (10) (both); pacemaker: 74 (11) (both) | After matching, ICD: 79% male (both); CRT-D: 73% male (both); Pacemaker: 55% male (both) | CIED                                    | Automatic | Passive | Not stated                                                         | Not specified                                                | RPM patients less likely to have ED presentations (P = 0.050) and had fewer hospital stays (P = 0.057). RPM patients did not significantly differ from control in ED presentations or hospital care. RPM patients over a 24-month period similar or less frequent utilization of emergency and hospital care, compared with those followed in the office (reductions in utilization most pronounced among ICDs).                                                                                | Decreased                                                                             |
| Lanssens, 2017 (Belgium)    | Cohort                                               | Gestational hypertensive disorders | 12            | 48 intervention; 98 control                                        | 31.69 (4.25) (Int); 31.94 (4.77) (control)                                                             | 100% female (maternal prenatal study)                                                    | Peripheral devices                      | Manual    | Passive | Not stated ("Contacting patients at home" but did not specify how) | Not specified                                                | Prenatal hospitalisations and hospitalisations until delivery were lower in RPM vs. control when a univariate analysis was performed - 56.25% (27/48) vs. 74.49% (73/98) and 27.08% (13/48) vs. 62.24% (61/97). This was not significant in multivariate analysis.                                                                                                                                                                                                                              | No significant difference in multivariate analysis, decreased in univariate analysis. |
| Lanssens, 2018 (Belgium)    | Cohort                                               | Gestational hypertensive disorders | 12            | 90 intervention; 320 control                                       | 30.97 (±5.61) (Int); 30.53 (±5.17) (control)                                                           | 100% female (maternal prenatal study)                                                    | Peripheral devices                      | Manual    | Passive | Not stated ("Contacting patients at home" but did not specify how) | Not specified                                                | In both uni- and multivariate analyses, RPM group had, vs. control group, less prenatal admission (51.62% vs. 71.63%), and less prenatal admissions until the moment of the delivery (31.40% vs. 57.67%).                                                                                                                                                                                                                                                                                       | Decreased                                                                             |
| Leng Chow, 2020 (Singapore) | Non-randomised controlled trial (Quasi-experimental) | Heart failure                      | 12            | 150 intervention; 55 control                                       | 57.9 (Int); 63.9 (control)                                                                             | 60.7% male (Int); 58.2% males (control)                                                  | Dedicated RPM unit + peripheral devices | Manual    | Active  | Telephone                                                          | All-cause and condition-specific                             | After adjusting for differences in age and years of HF diagnosis, average HF-related bed days per patient at 180 days (TM=1.2, STS=6.0 days; p<0.01) and at one year (TM=2.2, STS=6.6 days; p=0.02), remained significantly lower for TM compared with STS. All-cause bed days per patient at 180 days were also significantly lower for TM compared with STS (TM=5.0, STS=9.8 days; p=0.03); TM was associated with reduced all-cause 180-day readmission by 38% (HR 0.62 (0.38–1.00); p=0.05) | Decreased                                                                             |
| Lew, 2018 (USA)             | Non-randomised controlled trial                      | Peritoneal dialysis patients       | Not specified | 269                                                                | 56 (43.6–64.3)                                                                                         | 56.9% male                                                                               | Peripheral devices                      | Manual    | Active  | VC                                                                 | Not specified                                                | Use of RPM collected weight associated with fewer hospitalisations (adjusted OR= 0.54, 95% CI 0.33–0.89) and shorter LOS (adjusted OR = 0.46, 95% CI 0.26–0.81). Use of RPM collected BP associated with longer LOS (adjusted OR = 1.95, 95% CI 1.10–3.46) and increased odds of hospitalisation (adjusted OR 1.65, 95% CI 1.02–2.65).                                                                                                                                                          | Decreased (when monitoring weight), increased (when monitoring BP).                   |
| López-Liria, 2020 (Spain)   | Non-randomised controlled trial (Quasi-experimental) | Patients with CIEDs (unspecified)  | 60            | 21 intervention; 34 control                                        | 81 ± 7 (Int); 8 ± 6 (control)                                                                          | 31% women                                                                                | CIED                                    | Automatic | Passive | Not stated                                                         | All-cause and condition-specific                             | Hospitalisations were 19 (90.48) in RM vs 33 (97.06) in control P = 0.323                                                                                                                                                                                                                                                                                                                                                                                                                       | No significant difference                                                             |
| Lu'thje, 2015 (Germany)     | RCT                                                  | Patients with CIEDs (unspecified)  | 15            | 73 intervention; 82 control                                        | 66.0 (± 12.0) (Int); 65.9 (± 12.1) (control)                                                           | 80.5% male (Int); 74.2% male (control)                                                   | CIED                                    | Automatic | Passive | Telephone                                                          | Condition-specific                                           | The mean number of ED presentations was not significantly different between the two groups (RPM group 0.10 + 0.25 vs. control group 0.10 + 0.23; P = 0.7295). 20 RPM patients and 22 control patients were hospitalised for worsened HF (no significance test stated).                                                                                                                                                                                                                          | No significant difference                                                             |

|                                 |                    |                                        |    |                                  |                                                    |                                                                    |                                         |        |         |                                                            |                                  |                                                                                                                                                                                                                                                                                                                                                                                                                                              |                                                                     |
|---------------------------------|--------------------|----------------------------------------|----|----------------------------------|----------------------------------------------------|--------------------------------------------------------------------|-----------------------------------------|--------|---------|------------------------------------------------------------|----------------------------------|----------------------------------------------------------------------------------------------------------------------------------------------------------------------------------------------------------------------------------------------------------------------------------------------------------------------------------------------------------------------------------------------------------------------------------------------|---------------------------------------------------------------------|
| Lyth, 2019 (Sweden)             | Cohort             | HF, COPD                               | 12 | 94                               | HF: 84 (65–100)<br>COPD: 74 (65–86)                | HF: 50% female<br>COPD: 61.1% female                               | Digital pen and Health Diary System     | Manual | Active  | SMS                                                        | Condition-specific               | Hospitalisations was 0.94 for HF and 1.16 for COPD. This was significantly lower than expected, with 67% in the HF group (P<0.001) and 61% in the COPD group (P = 0.003). Mean values for inpatient care and emergency care in HF and COPD significantly lower in observed vs. expected (P<0.001).                                                                                                                                           | Decreased                                                           |
| Martin-Lesende, 2017 (Spain)    | Cohort             | HF, COPD or other chronic lung disease | 12 | 28                               | 78.9 (7.5)                                         | 45.3% male                                                         | Smartphone                              | Manual | Passive | SMS                                                        | All-cause and condition-specific | Significant reduction in hospitalisations, from 2.6 admissions/patient in the previous year (SD: 1.6) to 1.1 (SD: 1.5) during the one year RPM follow-up (P<0.001), and ED presentations, from 4.2 (SD: 2.6) to 2.1 (SD: 2.6) (P<0.001) was observed. The LOS was reduced non-significantly from 11.4 to 7.9 days.                                                                                                                           | Decreased hospitalisations and ED, no significant difference in LOS |
| McDowell, 2015 (UK)             | RCT                | COPD                                   | 6  | 48 intervention;<br>52 control   | 69.8 (7.1) (Int); 70.2 (7.4) (control)             | 58.2% female (Int); 54.5% female (control)                         | Dedicated RPM unit + peripheral devices | Manual | Active  | Not stated - ("Contacted patient" but did not specify how) | Not specified                    | At 6 months there was a higher number of ED presentations, hospitalisations and longer LOS in control group vs. RPM group, but differences were NS (P = 0.40, P = 0.42, P = 0.59 respectively).                                                                                                                                                                                                                                              | No significant difference                                           |
| McElroy, 2016 (USA)             | Cohort             | Patients post surgery (cardiac)        | 1  | 27 intervention;<br>416 control  | 62.9 (9.8) (intervention); 65.9 (14.1) (control)   | 85.2% male (intervention); 65.9% male (control)                    | Tablet + peripheral devices             | Manual | Active  | Telephone, VC                                              | Not specified                    | Readmission rate for the RPM and control groups were similar (7.4% vs. 9.9%, P = 0.65). LOS 9.1 ± 9.0 vs. RPM 8.7 ± 3.6 P = 0.65.                                                                                                                                                                                                                                                                                                            | No significant difference                                           |
| Milan Manani, 2020 (Italy)      | Case-control       | Peritoneal dialysis patients           | 6  | 35 intervention;<br>38 control   | 62.8 (44.7–77.1) (Int); 57.9 (50.0–73.1) (control) | 77% male (intervention); 71% male (control)                        | NS                                      | Both   | NS      | Not stated                                                 | All-cause and condition-specific | Decreased disease-specific hospitalizations (RPM 18.2% versus control 77.8%) (p = 0.022); 4 reasons for ED visits and significantly decreased two: Overhydration, mean ± SD RPM 0.17 ± 0.45bs control 0.66 ± 1.36 P = 0.0421; Exit site infections, mean ± SD RPM 0.17 ± 0.56 vs 0.42 ± 0.85 P = 0.0451.                                                                                                                                     | Decreased                                                           |
| Mirón Rubio, 2018 (Spain)       | Cohort             | COPD                                   | 6  | 26                               | 78 (7.9)                                           | 93% male                                                           | Dedicated RPM unit + peripheral devices | Manual | Passive | Telephone, In-person                                       | Not specified                    | The number of ED presentations decreased by 38%, from 53 visits during control period (in 26 (92.9%) patients; mean 1.89 visits/patient; range 0–6) to 33 visits during RPM period (in 15 (53.6%) patients; mean 1.18 visits/patient; range 0–6, p = 0.03). Fewer hospitalisations or ED presentations during RPM period: only 15 patients (53.6%) vs. 26 (92.8%) patients during control period (RR = 0.58; CI 95% 0.40 – 0.83, P = 0.002). | Decreased                                                           |
| Mizukawa, 2019 (Japan)          | RCT                | Heart failure                          | 24 | 15 (Int); 15 (control)           | 70.5 ± 13.3 (Int); 74.5 ± 12.1 (control)           | 50% male (intervention); 52.6% male (control)                      | Dedicated RPM unit + peripheral devices | Manual | Active  | Not stated                                                 | All-cause and condition-specific | Rates of readmission for HF were significantly different (P = 0.048), with significant improvement in the CM group, as compared with the UC group (P = 0.020). The hazard ratio for HF readmissions in the CM group versus the UC group was 0.29 (95% CI, 0.09 to 0.92; P = 0.035)                                                                                                                                                           | Decreased                                                           |
| Nancarrow, 2016 (Australia)     | Cohort             | Geriatric                              | 12 | 200                              | 74.8 ± (8.2)                                       | 41.5% male                                                         | Tablet + peripheral devices             | Manual | Active  | VC                                                         | Not specified                    | Self-reported health service use showed decline in ED presentations ( $\chi^2 = 14.950$ , n = 122; 6 df, P = 0.021); hospitalisation (non-local) ( $\chi^2 = 61.44$ , n = 118, 12 df, P<0.001). However, there was no significant difference in hospitalisation in the local hospital ( $\chi^2 = 21.190$ , n = 122; 16 df, P = 0.171).                                                                                                      | Decreased ED, no significant difference local hospitalisations      |
| Nouryan, 2019 (USA)             | RCT                | Heart failure                          | 6  | 42 intervention;<br>47 control   | 81.4 (Int); 84.9 (control)                         | 32% male                                                           | Dedicated RPM unit + peripheral devices | Manual | Active  | VC, Feedback reports to patient as well                    | All-cause and condition-specific | 38% of RPM patients had ≥1 ED presentation vs. 60% of control (P = 0.04), while 48% of RPM had ≥1 hospitalisation vs. 55% of control (P = 0.47). LOS (days) was 4.0 for RPM vs. 7.4 for control (P = 0.39).                                                                                                                                                                                                                                  | Decreased ED, hospitalisation and LOS not significantly different   |
| Nunes-Ferreira, 2020 (Portugal) | Quasi-experimental | Heart failure                          | 12 | 25 intervention;<br>50 control   | 65.4 ± 9.7 (Int); 64.58 ± 13.73 (control)          | 32% female (Int); 38% female (control)                             | Dedicated RPM unit + peripheral devices | Manual | Passive | Not stated                                                 | All-cause and condition-specific | RPM significantly reduced HF-related hospitalisation rate (12% vs. 36%, HR 0.29; 95% CI 0.10–0.89; P < 0.05) and all-cause hospitalisations (HR 0.29; 95% CI 0.11–0.75; P < 0.001); Patients in the TM group lost an average of 5.6 days per year compared with 48.8 days in the UC group.                                                                                                                                                   | Decreased                                                           |
| Olivari, 2018 (Italy)           | RCT                | Heart failure                          | 12 | 229 intervention;<br>110 control | 79.6 ± 6.8 (Int); 80.9 ± 7.3 (control)             | 61.1% male (Int); 65.4% male (control)                             | Dedicated RPM unit + peripheral devices | Manual | Passive | Not stated                                                 | All-cause                        | In the RPM and control group respectively, mean LOS of 13.1 ± 16.3 and 16.5 ± 32.0 (P = 0.21) days. Hospitalisations for HF occurred in 161 and 93, with a mean LOS of 13.5 ± 14.2 and 19.0 ± 39.3 (P = 0.20) days, in the RPM and control group, respectively.                                                                                                                                                                              | No significant difference                                           |
| Ong, 2016 (USA)                 | RCT                | Heart failure                          | 6  | 715 intervention;<br>722 control | 73 (62-84) (Int); 74 (63-82) (control)             | 46.6% (42.9-50.2) female (Int); 47.1% female (42.8-51.4) (control) | Dedicated RPM unit + peripheral devices | Manual | Active  | Telephone                                                  | All-cause                        | The RPM and control groups did not differ significantly in readmissions for any cause 180 days after discharge, which occurred in 50.8% (363 of 715) and 49.2% (355 of 722) of patients, respectively (adjusted HR = 1.03; 95% CI 0.88-1.20; P = 0.74).                                                                                                                                                                                      | No significant difference                                           |
| Orozco-Beltran, 2017 (Spain)    | Quasi-experimental | Chronic conditions (unspecified)       | 12 | 521                              | 70.4 (10.3)                                        | 38.9% female                                                       | Tablet                                  | Manual | Passive | Telephone, VC                                              | All-cause and condition-specific | Decrease in ED presentations (98, 18.8% vs. 67, 12.8%; P<0.001). Fewer hospitalisations due to an emergency (105, 20.2% vs. 71, 13.6%; P<0.001) or disease exacerbation (55, 10.5% vs. 42, 8.1%; P<0.001).                                                                                                                                                                                                                                   | Decreased                                                           |

|                           |                                             |                                     |    |                                     |                                                        |                                        |                                         |           |         |                           |                                  |                                                                                                                                                                                                                                                                                                                                                                                                                                                                                                                     |                                                                                                          |
|---------------------------|---------------------------------------------|-------------------------------------|----|-------------------------------------|--------------------------------------------------------|----------------------------------------|-----------------------------------------|-----------|---------|---------------------------|----------------------------------|---------------------------------------------------------------------------------------------------------------------------------------------------------------------------------------------------------------------------------------------------------------------------------------------------------------------------------------------------------------------------------------------------------------------------------------------------------------------------------------------------------------------|----------------------------------------------------------------------------------------------------------|
| Pedone, 2015 (Italy)      | RCT                                         | Heart failure                       | 6  | 50 intervention; 46 control         | 79.9 ± 6.8 (Int); 79.7 ± 7.8 (control)                 | 46.8% male (Int); 30.2% male (control) | Smartphone + peripheral devices         | Manual    | Active  | Telephone                 | All-cause                        | Hospitalisations during the 6 months of follow-up: 20 in control group (incidence rate 129/100 person-years, 95% CI = 84–200) and 8 (incidence rate 39/100 person-years, 95% CI = 20–77) in RPM group (IRR = 0.30, 95% CI 0.12–0.67).                                                                                                                                                                                                                                                                               | Decreased                                                                                                |
| Pekmezaris, 2019 (USA)    | RCT                                         | Heart failure                       | 3  | 46 intervention; 58 control         | 58.4 (15.2, 19–93) (Int); 61.1 (15.0, 26–90) (control) | 43% female (Int); 40% female (control) | Dedicated RPM unit + peripheral devices | Manual    | Active  | Telephone, VC             | All-cause and condition-specific | Groups did not differ regarding binary ED presentations (RR = 1.37, CI 0.83–2.27), hospitalization (RR = 0.92, CI 0.57–1.48), or length of stay in days (RPM = 0.54 vs. control = 0.91). Number of all-cause hospitalisations was significantly lower for control (RPM = 0.78 vs. control = 0.55; P = 0.03).                                                                                                                                                                                                        | No significant difference in binary ED, hospitalisation, or LOS, increased for all-cause hospitalisation |
| Persson, 2019 (Sweden)    | Cohort                                      | HF, COPD                            | 12 | 53                                  | HF - 83±7 (65–100); COPD - 75±6 (65–86)                | 54.2% female                           | Digital pen and Health Diary System     | Manual    | Passive | Not stated                | All-cause                        | Compared to adjusted hospitalization rates prior inclusion, the intervention significantly reduced hospitalization rates for both groups                                                                                                                                                                                                                                                                                                                                                                            | Decreased                                                                                                |
| Piccini, 2016 (USA)       | Cohort                                      | Patients with CIEDs (unspecified)   | 19 | 34,259 intervention; 58,307 control | 69.7 ± 12.7 (Int); 72.6 ± 13.1 (control)               | 66.1% male (Int); 60.9% male (control) | CIED                                    | Automatic | Passive | Not stated                | All-cause                        | RPM had lower adjusted risk of all-cause hospitalisation (adjusted HR = 0.82; 95% CI 0.80–0.84; P = 0.001) and shorter mean LOS (5.3 days vs. 8.1 days, P < 0.001).                                                                                                                                                                                                                                                                                                                                                 | Decreased                                                                                                |
| Ricci, 2017 (Italy)       | Quasi-experimental                          | Patients with CIEDs (unspecified)   | 12 | 102 intervention; 107 control       | 69.69 ± 10.17 (Int); 68.89 ± 11.46 (control)           | 84.31% male (Int); 85.98% (control)    | CIED + transmitter                      | Automatic | Passive | Dedicated RM unit message | Condition-specific               | More CV-related hospitalisations in control vs. RPM patients (SC: 22 (24.72%) vs. RPM: 7 (8.14%); P = 0.0032); more ED presentations (control: 5 (5.62%) vs. RPM: 0 (0.00%); P = .059); Regarding CV hospitalisations, there was no statistically significant difference in LOS between patients with RPM and control patients (6.6 ± 4.7 days [44 hospitalizations] vs. 6.4 ± 4.8 days [14 hospitalizations], P = 0.8990).                                                                                         | Decreased ED and hospitalisations, no significant difference in LOS                                      |
| Riley, 2015 (USA)         | Cohort                                      | Heart failure                       | 6  | 45 intervention; 45 control         | Of those matched 65.9 (14.7)                           | Of those matched 48.9% female          | Smartphone + peripheral devices         | Manual    | Active  | Not stated                | Not specified                    | Matched cohort saw similar decrease pre/post as RPM saw pre/post. For comparing directly enrolled vs. matched at 30 days post - 0.47 (1.10) vs. 0.56 (0.87); 60 days 1.24 (3.24) vs. 0.87 (1.44); 182 days 1.87 (4.54) vs. 1.22 (1.71). For enrolled vs. matched, at 30 days, time F (1,88) = 43.87, p < 0.0001, time · group = 0.63, p = 0.429; at 90 days, time F (1,88) = 50.87, p < 0.0001, time · group = 0.12, p = 0.727; and at 182 days, time F (1,88) = 45.36, p < 0.0001, time · group = 1.00, p = 0.320. | No significant difference                                                                                |
| Ringbæk, 2015 (Denmark)   | RCT                                         | COPD                                | 6  | 141 intervention; 140 control       | 69.8 (9.0) (Int); 69.4 (10.1) (control)                | 61% female (Int); 45% female (control) | Tablet + peripheral devices             | Manual    | Active  | VC                        | Condition-specific               | No significant difference found in hospital admissions for COPD between the groups (P = 0.74).                                                                                                                                                                                                                                                                                                                                                                                                                      | No significant difference                                                                                |
| Rosner, 2018 (USA)        | Cohort                                      | Patients post surgery (orthopaedic) | 3  | 186 intervention; 372 control;      | 57.00 (7.32)                                           | 50% female                             | Website                                 | Manual    | Active  | E-mail                    | Not specified                    | 90 day hospitalisation rates in baseline and RPM groups were 3.0% (11 of 372) and 1.6% (3 of 186), respectively (RR = 0.545; CI 0.154 - 1.931, P = 0.40).                                                                                                                                                                                                                                                                                                                                                           | No significant difference                                                                                |
| Sanabria, 2019 (Colombia) | Cohort                                      | Peritoneal dialysis patients        | 12 | 360                                 | 57±17                                                  | 44% female                             | Dedicated RPM unit                      | Manual    | Both    | Not stated                | Not specified                    | RPM decreased hospitalization rate (0.36 fewer hospitalizations per patient-year; IRR 0.61 [95% CI 0.39 – 0.95]; p = 0.029) and hospitalization days (6.57 fewer days per patient-year; IRR 0.46 [95% CI 0.23 – 0.92]; p = 0.028).                                                                                                                                                                                                                                                                                  | Decreased                                                                                                |
| Sardu, 2016 (USA)         | RCT                                         | Patients with CIEDs (HF)            | 12 | 89 intervention; 94 control         | 71.8 ± 8.5 (Int); 72.6 ± 5.7 (control)                 | 71.9 male (Int); 79.8% male (control)  | CIED                                    | Automatic | Active  | Telephone, In-person      | Condition-specific               | There was a significant difference in hospitalisations (15.7 vs. 28.7, P = 0.02) comparing RPM patients to control group. At multivariate analysis, RPM was the only factor predicting HF hospitalisation (HR = 0.6, 95% CI 0.42–0.79, P = 0.002).                                                                                                                                                                                                                                                                  | Decreased                                                                                                |
| Shany, 2017 (Australia)   | RCT                                         | COPD                                | 12 | 11 intervention; 18 control         | 72.1 ± 7.5 (Int); 74.2 ± 9.0 (control)                 | 48% male (Int); 43% male (control)     | Dedicated RPM unit                      | Manual    | Active  | Telephone, In-person      | Condition-specific               | No statistically significant differences were demonstrated for the rate of ED presentations and hospitalisations. However, during the study, being in RPM group was associated with 20% relative reduction in the risk of admission and 14% relative reduction in the risk of ED presentation. Analysed as LOS per admission, there was no significant difference between the control and RPM patients.                                                                                                             | No significant difference, though some relative reduction in risk                                        |
| Sink, 2018 (USA)          | RCT - except 17 non-randomised participants | COPD                                | 8  | 83 intervention; 85 control         | 59.89 ± 1.09 (Int); 61.94 ± 1.07 (control)             | 34.9% male (Int); 37.6% male (control) | Smartphone                              | Manual    | Passive | Not stated                | Condition-specific               | There were significantly fewer COPD-related hospitalisations in RPM group vs. control with 6 and 16, respectively. The absolute RR was 11.6% and the relative RR was 61.7%.                                                                                                                                                                                                                                                                                                                                         | Decreased                                                                                                |
| Soriano, 2018 (Spain)     | RCT                                         | COPD                                | 12 | 87 intervention; 82 control         | 71.5 ± 8.0 (Int); 71.3 ± 8.9 (control)                 | 78.3% male (Int); 82.5% male (control) | Telephone                               | Manual    | Passive | SMS                       | Condition-specific               | Shorter mean LOS in RPM group (18.9 ± 16.1 days) compared to the control group (22.4 ± 19.5 days, P = 0.308). There were no statistically significant differences in primary efficacy analysis of the proportion of participants who had a severe exacerbation leading to a hospital admission or ED presentation over the 12-month period (60% in RPM vs. 53.5% in control, P = 0.321).                                                                                                                            | No significant difference                                                                                |

|                                                     |              |                                        |    |                                                                |                                                      |                                                                |                                         |           |         |                                                  |                                  |                                                                                                                                                                                                                                                                                                                                                                                                                                                                                                                                                                              |                                                                               |
|-----------------------------------------------------|--------------|----------------------------------------|----|----------------------------------------------------------------|------------------------------------------------------|----------------------------------------------------------------|-----------------------------------------|-----------|---------|--------------------------------------------------|----------------------------------|------------------------------------------------------------------------------------------------------------------------------------------------------------------------------------------------------------------------------------------------------------------------------------------------------------------------------------------------------------------------------------------------------------------------------------------------------------------------------------------------------------------------------------------------------------------------------|-------------------------------------------------------------------------------|
| Srivastava, 2019 (USA)                              | Cohort       | Heart failure                          | 12 | 197 intervention; 870 control                                  | 73.4 (11.14) (Int); 75.4 (11.0) (control)            | 98.0% male (Int); 97.7% male (control)                         | Dedicated RPM unit + peripheral devices | Manual    | Active  | Telephone                                        | Not specified                    | A significantly lower total admissions (1.1 vs. 1.6 admissions) and LOS (5.7 vs. 11.3 days) were seen in RPM group compared to the prior year (1.6 vs. 1.7, P<0.05; and 9.5 vs. 14 days, P<0.01, respectively). The RPM group also had a significantly lower LOS vs. control group (9.0 vs. 14.9, P<0.01). However, there was no significant difference in hospitalisations between the RPM group and control group (1.4 vs. 2.0, P<0.07). The number of ED presentations was not significantly different.                                                                   | Decreased if looking pre-post, no significant difference compared to controls |
| Stamenova, 2020 (Canada)                            | RCT          | COPD                                   | 6  | 41 intervention; 40 control                                    | 71.98 (9.52) (Int); 72.78 (9.16) (control)           | 44% female (Int); 48% female (control)                         | Dedicated RPM unit + peripheral devices | Manual    | Passive | Telephone                                        | All-cause and condition specific | No significant difference in number of ED visits and hospitalizations during the 6 months preceding enrollment and during their participation in the trial. For COPD-related hospital admissions, there was a decrease but not a statistically significant effect across the 3 groups (P=0.07). No effect for COPD-related ED visits.                                                                                                                                                                                                                                        | No significant difference                                                     |
| Tajstra, 2020 (Poland)                              | RCT          | Patients with CIEDs (HF)               | 12 | 299 intervention; 301 control                                  | 64.0 (13.0) (Int); 64.0 (12.0) (control)             | 81.6% male (Int); 80.7% male (control)                         | CIED + dedicated RPM unit               | Automatic | Both    | Not stated                                       | Condition-specific               | Hospitalization rate due to cardiovascular reasons was higher in control as compared to RPM (45.5% vs 37.1%, P = 0.045).                                                                                                                                                                                                                                                                                                                                                                                                                                                     | Decreased                                                                     |
| Ten Eyck, 2019 (USA)                                | Cohort       | Heart failure                          | 12 | Different levels of "engaged" interventions 8907; 8907 control | 73.0 (9.92) (Int); 73.68 (10.6) (control)            | 46.3% male (Int - engaged); 47.5% male (control - non-engaged) | Tablet + peripheral devices             | Manual    | Active  | Telephone                                        | All-cause                        | Engaged members who used their Bluetooth-enabled scales an average of 25 or more days per month demonstrated significantly lower post-index acute IP medical service utilisation vs. control group members (P<0.0001). Conversely, engaged members who used their scales ≤ 9 days per month or 9.1 to 18 days per month had significantly higher post-index acute IP medical service utilisation vs. control group (P< 0.0001 and P = 0.008, respectively). Engaged members had a significantly shorter average LOS vs. non-engaged members (4.14 vs. 4.66 days; P< 0.0001). | Decreased                                                                     |
| Thomason, 2015 (USA)                                | Cohort       | Heart failure                          | 3  | 80 intervention; 1276 control                                  | 83.75 (SD 8.61) (Int); 81.97 (SD 10.55) (control)    | 60% female (Int); 60.2% female (control)                       | Dedicated RPM unit                      | Manual    | Active  | Telephone                                        | All-cause                        | Control group had a 21% all-cause hospital readmission rate vs. RPM group who had a 10% all-cause readmission rate.                                                                                                                                                                                                                                                                                                                                                                                                                                                          | Decreased                                                                     |
| Trucco, 2019 (Italy)                                | Cohort       | Home-ventilated neuromuscular patients | 14 | 48 intervention; 48 control                                    | 16.4 (8.9–22.1) (Int); 15 (9.2–21.5) (control)       | 62.5% male (Int); 75.0% male (control)                         | Dedicated RPM unit + peripheral devices | Both      | Passive | Telephone, VC                                    | Condition-specific               | Hospitalisations were significantly reduced post-RPM patients when compared to pre-RPM (11 vs. 24, P = 0.04) and to controls (11 vs. 21, P = 0.03). Median LOS was significantly lower in RPM patients vs. controls (6 vs. 7 days, P = 0.03). ED presentations were significantly reduced during the RPM trial (from 12 to 2, P<0.05) while hospital admissions were not significantly lower during RPM compared with pre-RPM (from 12 to 9 P>0.05).                                                                                                                         | Decreased hospitalisations, LOS, ED                                           |
| Udsen, 2017 (Denmark)                               | Cluster RCT  | COPD                                   | 12 | 578 intervention; 647 control                                  | 69.55 (9.36) (Int); 70.33 (9.11) (control)           | 48.27% male (Int); 43.74% male (control)                       | Tablet + peripheral devices             | Manual    | Active  | Not stated                                       | Condition-specific               | Mean (SE) = Hospital admissions: RPM 2756.1 (463.8) vs. usual care 2753.1 (458.9); ED presentations 343.4 (24.8) vs. usual care 278.3 (21.5); Resource use is consistently higher in the RPM group.                                                                                                                                                                                                                                                                                                                                                                          | Increased                                                                     |
| van den Heuvel, 2020 (Netherlands)                  | Case-control | Gestational hypertensive disorders     | 9  | 103 intervention; 133 control                                  | 33.7 (4.6) (Int); 33.1 (4.7) (control)               | 100% female (maternal study)                                   | Dedicated RPM unit + peripheral devices | Manual    | Both    | Not stated                                       | Condition-specific               | Observational admissions for hypertension or diagnosis/exclusion of suspected preeclampsia were significantly lower in RPM compared to the control group (2.9% vs 13.5% of participants, p = 0.004).                                                                                                                                                                                                                                                                                                                                                                         | Decreased                                                                     |
| Vianello, 2016 (Italy)                              | RCT          | COPD                                   | 12 | 181 intervention; 81 control                                   | 75.96 (6.54) (Int); 76.48 (6.16) (control)           | 72.2% male (Int); 73.1% male (control)                         | Dedicated RPM unit + peripheral devices | Manual    | Active  | Telephone (only home visit for event management) | All-cause and condition-specific | The hospitalization rate for COPD and/or for any cause was not significantly different in the two groups (IRR = 0.89, 95% CI 0.79–1.04, P = 0.16 and IRR = 0.91, 95% CI 0.75 – 1.04); p = 0.16, respectively). The readmission rate for COPD and/or any cause was, however, significantly lower in the RPM group vs. control (IRR = 0.43, 95% CI 0.19–0.98, P = 0.01 and 0.46, 95% CI 0.24–0.89, P = 0.01, respectively). LOS was not significantly different in the two groups.                                                                                             | No significant difference                                                     |
| Wagenaar, 2019 (Netherlands)                        | RCT          | Heart failure                          | 12 | 150 intervention; 150 control                                  | 66.6 ± 11.0 (Int); 66.9 ± 11.6 (control)             | 75.3% male (Int); 72.7% male (control)                         | Website                                 | Manual    | Passive | Telephone, Website                               | All-cause and condition-specific | No difference in hospitalisations (RPM vs. UC, 57 vs. 66, HR = 0.85, 95% CI 0.59–1.21).                                                                                                                                                                                                                                                                                                                                                                                                                                                                                      | No significant difference                                                     |
| Walker, 2018 (UK, Estonia, Sweden, Spain, Slovenia) | RCT          | COPD                                   | 9  | 154 intervention; 158 control                                  | 71.0 (66.0, 75.8) (Int); 71.0 (65.3, 76.0) (control) | 65.6% male (Int); 66.5% male (control)                         | Tablet + peripheral devices             | Manual    | Passive | Telephone                                        | Not specified                    | The average LOS for all cause hospitalisations was 4.0 (IQR:1.0 - 9.0) days for control group and 1.0 (IQR:1.0 - 6.7) day for RPM group (P = 0.045). Compared to control, RPM patients who were hospitalised during the trial (n=41 and 45, respectively) were less than half as likely to be re-hospitalised (IRR = 0.46, P = 0.017). There was no difference between groups in the rate of hospitalisation (0.79 vs. 0.99, P = 0.276).                                                                                                                                     | Decreased LOS, no significant difference in hospitalisation                   |



|                            |              |                                 |    |                                                                                                                                 |                        |                                        |                                                 |           |         |            |                                  |                                                                                                                                                                                                                                                                                                                                                                                                                                                                                                                                                                                                                                                                                                                                                                                                       |                                                      |
|----------------------------|--------------|---------------------------------|----|---------------------------------------------------------------------------------------------------------------------------------|------------------------|----------------------------------------|-------------------------------------------------|-----------|---------|------------|----------------------------------|-------------------------------------------------------------------------------------------------------------------------------------------------------------------------------------------------------------------------------------------------------------------------------------------------------------------------------------------------------------------------------------------------------------------------------------------------------------------------------------------------------------------------------------------------------------------------------------------------------------------------------------------------------------------------------------------------------------------------------------------------------------------------------------------------------|------------------------------------------------------|
| Ware, 2020 (Canada)        | Cohort       | Heart failure                   | 6  | 156                                                                                                                             | 58.3 (15.5)            | 77.8% male                             | Smartphone + peripheral devices                 | Manual    | Passive | Not stated | All-cause and condition-specific | HF-related hospitalizations decreased from 0.46 (0-4, 0.71) to 0.23 (0-3, 0.51); IRR 0.50 (P<.001). All-cause hospitalizations decreased from 0.64 (0-7, 0.89) to 0.49 (0-6, 0.97); IRR 0.76 (P=.02). LOS & ED visits (HF related and all cause) no significant difference between baseline and 6 months.                                                                                                                                                                                                                                                                                                                                                                                                                                                                                             | Decreased hospitalisations but no change LOS and ED. |
| White-Williams, 2015 (USA) | Cohort       | Heart failure                   | 3  | 235 intervention; 91 control                                                                                                    | 77 (Int); 71 (control) | 47.7% male (Int); 52.7% male (control) | Remote monitoring system/device (not specified) | Manual    | Active  | Telephone  | Not specified                    | The results of the tests indicated that there was no statistical significant difference in ED presentations and hospital readmissions between usual care and RPM group (Pearson chi-squared = 0.518 and 0.086, respectively, P > .05).                                                                                                                                                                                                                                                                                                                                                                                                                                                                                                                                                                | No significant difference                            |
| Williams, 2016 (USA)       | Case control | Heart failure                   | 2  | 105 intervention; 210 control                                                                                                   | NR                     | 43.8% male (Int); 46.7% male (control) | Dedicated RPM unit + peripheral devices         | Manual    | Active  | Telephone  | Condition-specific               | No significant associations between RPM and hospital readmissions, $\chi^2 = (1, n = 210, p\text{-value} = 0.71, \phi = 0.71)$                                                                                                                                                                                                                                                                                                                                                                                                                                                                                                                                                                                                                                                                        | No significant difference                            |
| Zakeri, 2020 (UK)          | Cohort       | Patients with CIEDs (HF and AF) | 34 | 1561; No AF - 616 interventional; 595 control; Paroxysmal - 57 Intervention, 35 control; PP AF -134 interventional, 124 control | NR                     | NR                                     | CIED                                            | Automatic | NS      | Not stated | All-cause and condition-specific | In patients with persistent/permanent AF, RM increased risk of recurrent cardiovascular (HR 1.40, 95% CI 1.06–1.85, P = 0.018) and HF-related (HR 2.05, 95% CI 1.14–3.69, P = 0.016) hospitalisations; For patients with paroxysmal AF and no AF, there was no difference in the risk of CV or HF-related hospitalisation (as a first or recurrent event) with RPM vs. usual care; When the dataset was truncated after the fifth hospitalisation (n = 103 CV hospitalisations excluded), the positive association between RPM and HF-related hospitalisations for patients with persistent/permanent AF remained statistically significant (HR 1.84, 95% CI 1.07–3.17, P = 0.027), while the association with CV hospitalisations was borderline significant (HR 1.32, 95% CI 1.00–1.75, P = 0.054). | Increased                                            |

CI = confidence interval; CIED: cardiovascular implantable electronic device; COPD = chronic obstructive pulmonary disease; CRT-D = cardiac resynchronisation therapy defibrillator; CV = cardiovascular; df= degrees of freedom; ED = emergency department; HF = heart failure; HR = hazard ratio; IBD=inflammatory bowel disease; ICD= implantable cardioverter defibrillator; Int= Intervention/RPM group; IQR = inter-quartile range; IRR = incidence rate ratio; LOS = length of stay; NS = not significant; OR = odds ratio; RCT = randomised controlled trial; RPM = remote patient monitoring; RR = risk ratio or risk reduction; SD = standard deviation
