# Supplementary material for: Does remote patient monitoring reduce acute care use? A systematic review
Source: PubMed Central journal article supplement — BMJ Open. 2021 Mar 2;11(3):e040232. doi: 10.1136/bmjopen-2020-040232 (PMC7929874; doi:10.1136/bmjopen-2020-040232), 2021-03-02
Supplement: bmjopen-2020-040232supp002.pdf [file bmjopen-2020-040232supp002.pdf]

Supplementary Table 2. Participant vitals monitored by RPM device in each study

| First author, Year          | Patient Group or Disease                                    | Comorbidities mentioned | BP | HR | SpO2 | HbA1c | Weight | Temp | ECG | FEV1 | Patient or informant questionnaires (e.g. symptoms) | Other                                               |
|-----------------------------|-------------------------------------------------------------|-------------------------|----|----|------|-------|--------|------|-----|------|-----------------------------------------------------|-----------------------------------------------------|
| Celler, 2018                | Chronic conditions (unspecified)                            | Yes                     | X  | X  | X    |       |        | X    | X   | X    |                                                     |                                                     |
| Kenealy, 2015               | Chronic conditions (unspecified)                            | Yes                     | X  |    | X    | X     | X      |      |     |      |                                                     |                                                     |
| Orozco-Beltran, 2017        | Chronic conditions (unspecified)                            | Yes                     | X  |    | X    | X     | X      |      |     | X    |                                                     |                                                     |
| Chatwin, 2016               | Chronic lung disease (COPD and chronic respiratory failure) | Yes                     | X  | X  | X    |       | X      |      |     |      | X                                                   |                                                     |
| Ishani, 2016                | CKD                                                         | Yes                     | X  | X  | X    | X     | X      |      |     |      |                                                     |                                                     |
| Ho, 2016                    | COPD                                                        | NS                      | X  |    | X    |       | X      | X    |     |      | X                                                   | Other "Vital signs" (NS)                            |
| Sink, 2018                  | COPD                                                        | NS                      |    |    |      |       |        |      |     |      | X                                                   | Breathing rating (better, worse, or                 |
| Achelrod, 2017              | COPD                                                        | Yes                     |    |    | X    |       |        |      |     | X    | X                                                   |                                                     |
| Alshabani, 2019             | COPD                                                        | Yes                     |    |    |      |       |        |      |     |      |                                                     | Adherence - inhaler                                 |
| Clarke, 2018                | COPD                                                        | Yes                     | X  |    | X    |       | X      | X    |     |      | X                                                   |                                                     |
| Esteban, 2016               | COPD                                                        | Yes                     |    | X  | X    |       |        | X    |     |      | X                                                   | Activity + respiratory rate                         |
| Kessler, 2018               | COPD                                                        | Yes                     |    |    |      |       |        |      |     |      |                                                     | "Health status information"                         |
| McDowell, 2015              | COPD                                                        | Yes                     | X  | X  | X    |       |        |      |     |      | X                                                   |                                                     |
| Mirón Rubio, 2018           | COPD                                                        | Yes                     | X  | X  | X    |       |        |      |     |      |                                                     |                                                     |
| Ringbæk, 2015               | COPD                                                        | Yes                     |    |    | X    |       | X      |      |     | X    | X                                                   |                                                     |
| Shany, 2017                 | COPD                                                        | Yes                     | X  | X  | X    | X     | X      | X    | X   | X    | X                                                   |                                                     |
| Soriano, 2018               | COPD                                                        | Yes                     | X  |    | X    |       |        |      |     | X    |                                                     | oxygen therapy                                      |
| Stamenova, 2020             | COPD                                                        | Yes                     | X  |    | X    |       | X      | X    |     |      | X                                                   |                                                     |
| Udsen, 2017                 | COPD                                                        | Yes                     | X  | X  | X    |       | X      |      |     |      |                                                     |                                                     |
| Vianello, 2016              | COPD                                                        | Yes                     |    | X  | X    |       |        |      |     |      |                                                     |                                                     |
| Walker, 2018                | COPD                                                        | Yes                     | X  | X  | X    |       |        | X    |     |      |                                                     | Respiratory measures (forced oscillation technique) |
| Bohingamu Mudiyansele, 2019 | COPD or Diabetes                                            | Yes                     | X  | X  | X    | X     |        |      |     |      |                                                     |                                                     |
| Nancarrow, 2016             | Geriatric                                                   | Yes                     | X  |    | X    | X     | X      | X    |     |      |                                                     | Other "Vital signs" (NS)                            |
| Lanssens, 2017              | Gestational hypertensive disorders                          | Yes                     | X  |    |      |       | X      |      |     |      |                                                     | Activity                                            |
| Lanssens, 2018              | Gestational hypertensive disorders                          | Yes                     | X  |    |      |       | X      |      |     |      |                                                     | Activity                                            |
| van den Heuvel, 2020        | Gestational hypertensive disorders                          | Yes                     | X  |    |      |       |        |      |     |      | X                                                   |                                                     |
| Bingler, 2018               | Heart disease - infants                                     | NS                      |    |    | X    |       | X      |      |     |      |                                                     |                                                     |
| Gingele, 2019               | Heart failure                                               | NS                      |    |    |      |       |        |      |     |      | X                                                   |                                                     |
| Hale, 2016                  | Heart failure                                               | NS                      |    |    |      |       |        |      |     |      |                                                     | Adherence - medication                              |
| Koehler, 2018               | Heart failure                                               | NS                      | X  | X  | X    |       | X      |      | X   |      | X                                                   |                                                     |
| Nouryan, 2019               | Heart failure                                               | NS                      | X  | X  | X    |       | X      |      |     |      |                                                     |                                                     |
| Thomason, 2015              | Heart failure                                               | NS                      | X  | X  | X    |       | X      |      |     |      | X                                                   |                                                     |
| White-Williams, 2015        | Heart failure                                               | NS                      |    |    |      |       |        |      |     |      | X                                                   | "Vital signs" (NS)                                  |
| Agboola, 2015               | Heart failure                                               | Yes                     | X  | X  | X    |       | X      |      |     |      | X                                                   |                                                     |
| Amir, 2017                  | Heart failure                                               | Yes                     |    |    |      |       |        |      |     |      |                                                     | Lung fluid content                                  |
| Comin-Colet, 2016           | Heart failure                                               | Yes                     | X  | X  |      |       | X      |      |     |      | X                                                   |                                                     |
| Galinier, 2020              | Heart failure                                               | Yes                     | X  | X  | X    |       | X      |      | X   |      | X                                                   |                                                     |
| Jenneve, 2020               | Heart failure                                               | NS                      | X  | X  |      |       | X      |      |     |      |                                                     |                                                     |

|                        |                                        |     |   |   |   |  |   |   |   |   |   |                                                       |
|------------------------|----------------------------------------|-----|---|---|---|--|---|---|---|---|---|-------------------------------------------------------|
| Jimenez-Marrero, 2020  | Heart failure                          | Yes |   |   |   |  | X |   |   |   |   | "heart failure signs & symptoms" not specified        |
| Kalter-Leibovici, 2017 | Heart failure                          | Yes | X | X |   |  | X |   |   |   |   |                                                       |
| Kao, 2016              | Heart failure                          | Yes |   |   |   |  |   |   |   | X |   | "Vitals" (NS)                                         |
| Koulaouzidis, 2019     | Heart failure                          | Yes |   |   |   |  | X |   |   |   |   |                                                       |
| Kraai, 2016            | Heart failure                          | Yes |   |   |   |  | X |   |   | X |   |                                                       |
| Leng Chow, 2020        | Heart failure                          | Yes | X | X |   |  | X |   |   |   |   |                                                       |
| Mizukawa, 2019         | Heart failure                          | Yes | X | X |   |  | X |   |   |   |   |                                                       |
| Nunes-Ferreira, 2020   | Heart failure                          | Yes | X | X | X |  | X | X | X |   |   | Steps, body water content                             |
| Olivari, 2018          | Heart failure                          | Yes | X | X | X |  | X |   | X |   |   |                                                       |
| Ong, 2016              | Heart failure                          | Yes | X | X |   |  | X |   |   |   | X |                                                       |
| Pedone, 2015           | Heart failure                          | Yes | X | X | X |  |   |   |   |   |   |                                                       |
| Pekmezaris, 2019       | Heart failure                          | Yes | X | X | X |  | X |   |   |   |   |                                                       |
| Riley, 2015            | Heart failure                          | Yes | X | X | X |  | X |   |   |   |   |                                                       |
| Srivastava, 2019       | Heart failure                          | Yes | X | X | X |  | X |   |   |   |   |                                                       |
| Ten Eyck, 2019         | Heart failure                          | Yes |   |   |   |  | X |   |   |   | X |                                                       |
| Wagenaar, 2019         | Heart failure                          | Yes | X | X |   |  | X |   |   |   |   |                                                       |
| Ware, 2020             | Heart failure                          | NS  | X | X |   |  | X |   |   |   |   |                                                       |
| Williams, 2016         | Heart failure                          | Yes | X | X | X |  | X |   |   |   |   |                                                       |
| Davis, 2015            | HF, COPD                               | Yes |   | X | X |  | X |   |   |   |   |                                                       |
| Lyth, 2019             | HF, COPD                               | Yes |   |   |   |  |   |   |   |   | X | Intake - medication                                   |
| Persson, 2019          | HF, COPD                               | Yes | X |   | X |  | X | X |   | X | X |                                                       |
| Martin-Lesende, 2017   | HF, COPD or other chronic lung disease | Yes | X | X | X |  | X |   |   |   | X | Respiratory rate                                      |
| Trucco, 2019           | Home-ventilated neuromuscular patients | Yes |   | X | X |  |   |   |   |   |   | IPAP, EPAP, breathing patterns                        |
| Cross, 2019            | Inflammatory bowel disease             | NS  |   |   |   |  |   |   |   |   | X |                                                       |
| De Luca, 2016          | Nursing home patients; Mental health   | Yes | X |   | X |  |   |   | X |   |   |                                                       |
| McElroy, 2016          | Patients post surgery (cardiac)        | Yes | X | X | X |  | X |   |   |   | X |                                                       |
| Rosner, 2018           | Patients post surgery (orthopaedic)    |     |   |   |   |  |   |   |   |   | X |                                                       |
| De Simone, 2019        | Patients with CIEDs (AF)               | Yes |   | X |   |  |   |   |   |   |   | Heart rhythm, device functioning, arrhythmic episodes |
| Böhm, 2016             | Patients with CIEDs (HF)               | Yes |   |   |   |  |   |   |   |   |   | Intrathoracic fluid                                   |
| Boriani, 2017          | Patients with CIEDs (HF)               | Yes |   |   |   |  |   |   |   |   |   | Lung fluid content and atrial tachyarrhythmia,        |
| Capucci, 2017          | Patients with CIEDs (HF)               | Yes |   | X |   |  |   |   |   |   |   | Heart rhythm, device functioning                      |
| Geller, 2019           | Patients with CIEDs (HF)               | NS  |   | X |   |  |   |   | X |   |   | Heart rhythm, device functioning                      |
| Hansen, 2018           | Patients with CIEDs (HF)               | NS  |   | X |   |  |   |   | X |   |   | Heart rhythm, device functioning                      |
| Kurek, 2017            | Patients with CIEDs (HF)               | Yes |   | X |   |  |   |   |   |   |   | ICD data - NS                                         |
| Sardu, 2016            | Patients with CIEDs (HF)               | Yes |   | X |   |  |   |   |   |   |   | ICD data - NS                                         |
| Tajstra, 2020          | Patients with CIEDs (HF)               | Yes | X | X |   |  |   |   | X |   |   | Heart rhythm, device functioning                      |
| Zakeri, 2020           | Patients with CIEDs (HF and AF)        | Yes | X | X |   |  |   |   | X |   |   | Heart rhythm, device functioning                      |
| Heidbuchel, 2015       | Patients with CIEDs (unspecified)      | NS  |   | X |   |  |   |   | X |   |   | Heart rhythm, device functioning                      |

|                    |                                   |     |           |           |           |          |           |           |           |          |  |           |                                                                    |
|--------------------|-----------------------------------|-----|-----------|-----------|-----------|----------|-----------|-----------|-----------|----------|--|-----------|--------------------------------------------------------------------|
| Ricci, 2017        | Patients with CIEDs (unspecified) | NS  |           |           |           |          |           |           |           |          |  |           | ICD data - NS                                                      |
| Akar, 2015         | Patients with CIEDs (unspecified) | Yes |           | X         |           |          |           |           |           |          |  |           | Heart rhythm, device functioning                                   |
| Amara, 2017        | Patients with CIEDs (unspecified) | Yes |           | X         |           |          |           |           |           |          |  |           | Heart rhythm, device functioning, atrial tachyarrhythmia           |
| Buchta, 2017       | Patients with CIEDs (unspecified) | Yes |           | X         |           |          |           |           |           |          |  |           | Heart rhythm, device functioning                                   |
| Bulava, 2016       | Patients with CIEDs (unspecified) | Yes |           | X         |           |          |           |           |           |          |  |           | Heart rhythm, device functioning                                   |
| D'Ancona, 2017     | Patients with CIEDs (unspecified) | Yes |           | X         |           |          |           |           |           |          |  |           | Heart rhythm, device functioning                                   |
| De Simone, 2015    | Patients with CIEDs (unspecified) | Yes |           | X         |           |          |           |           |           |          |  |           | Heart rhythm, device functioning                                   |
| Ladapo, 2016       | Patients with CIEDs (unspecified) | Yes |           | X         |           |          |           |           |           |          |  |           | Cardiac monitoring - (NS)                                          |
| López-Liria, 2020  | Patients with CIEDs (unspecified) | NS  | X         | X         |           |          |           |           |           | X        |  |           | Heart rhythm, device functioning                                   |
| Lu`thje, 2015      | Patients with CIEDs (unspecified) | Yes |           |           |           |          |           |           |           |          |  |           | Fluid index                                                        |
| Piccini, 2016      | Patients with CIEDs (unspecified) | Yes |           |           |           |          |           |           |           |          |  |           | ICD data - NS (e.g. Heart rhythm, device functioning, arrhythmias) |
| Lew, 2018          | Peritoneal dialysis patients      | Yes | X         |           |           |          | X         |           |           |          |  |           |                                                                    |
| Milan Manani, 2020 | Peritoneal dialysis patients      | Yes | X         |           |           |          | X         |           |           |          |  |           |                                                                    |
| Sanabria, 2019     | Peritoneal dialysis patients      | Yes | X         |           |           |          | X         |           |           |          |  |           | Ultrafiltration profile, initial drainage                          |
| Flaherty, 2017     | Schizophrenia                     | NS  |           |           |           |          |           |           |           |          |  | X         |                                                                    |
| <b>TOTALS</b>      |                                   |     | <b>49</b> | <b>52</b> | <b>39</b> | <b>6</b> | <b>44</b> | <b>10</b> | <b>13</b> | <b>7</b> |  | <b>29</b> |                                                                    |

AF = atrial fibrillation; BP = blood pressure; CIED: cardiovascular implantable electronic device; CKD = chronic kidney disease; COPD = chronic obstructive pulmonary disease; ECG = electrocardiogram; EPAP = expiratory positive airway pressure; FEV1 = forced expiratory volume-one second; HbA1c = glycated haemoglobin; HF = heart failure; HR = heart rate; ICD= implantable cardioverter defibrillator; IPAP = inspiratory positive airway pressure; NS = not stated; SpO2= oxygen saturation
